# Supplementary material for: Occludin is a target of Src kinase and promotes lipid secretion by binding to BTN1a1 and XOR
Source: PubMed Central journal article supplement (PMC8797263; doi:10.1371/journal.pbio.3001518), 2022-01-18

Raw images for the blots in Fig.3E

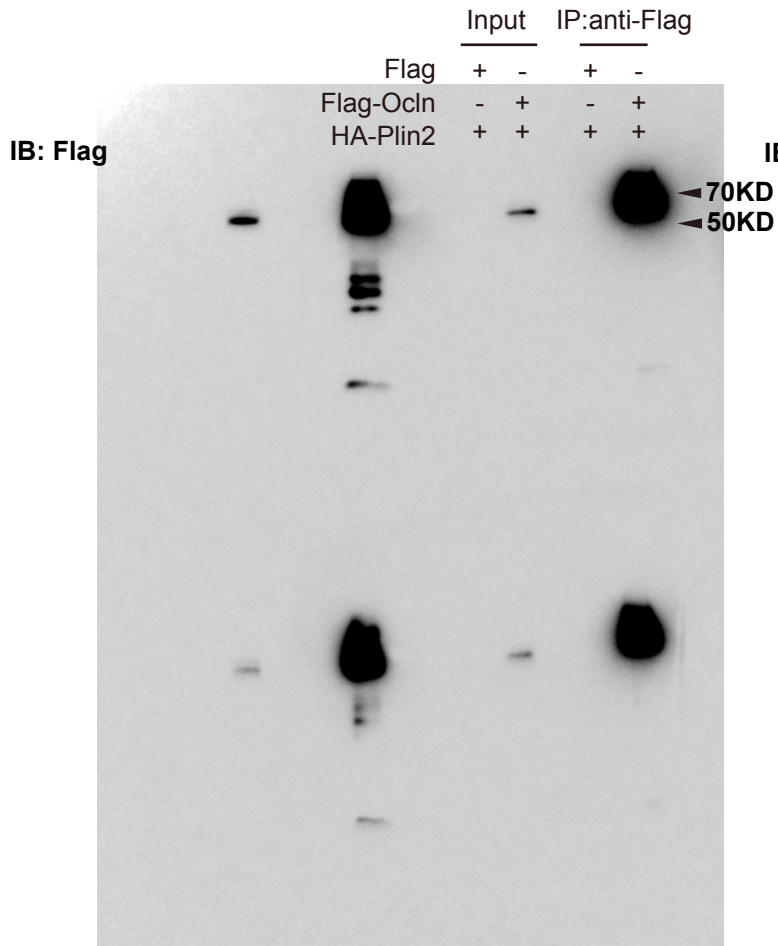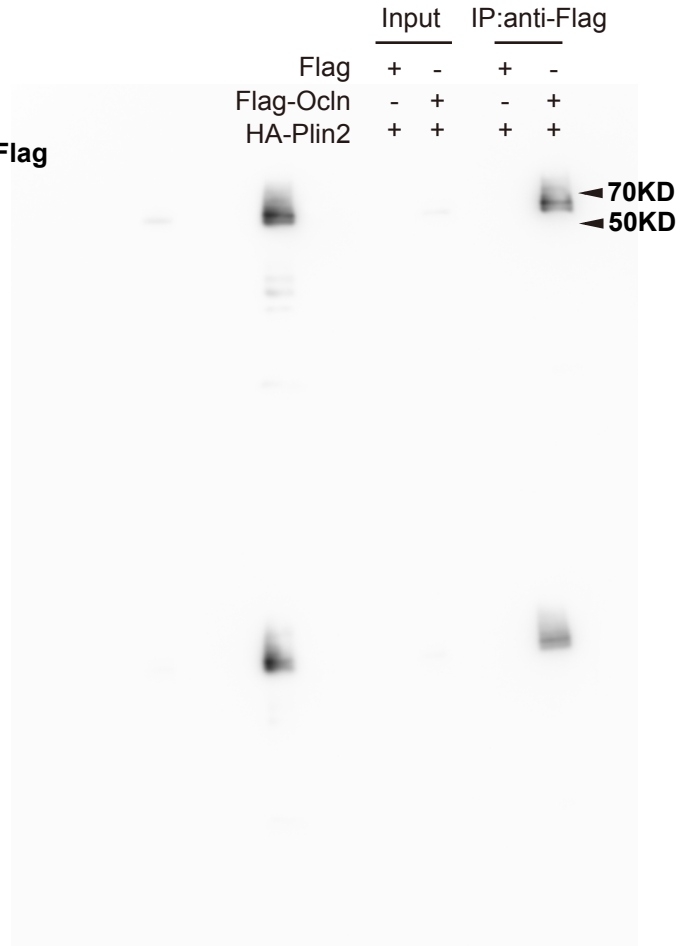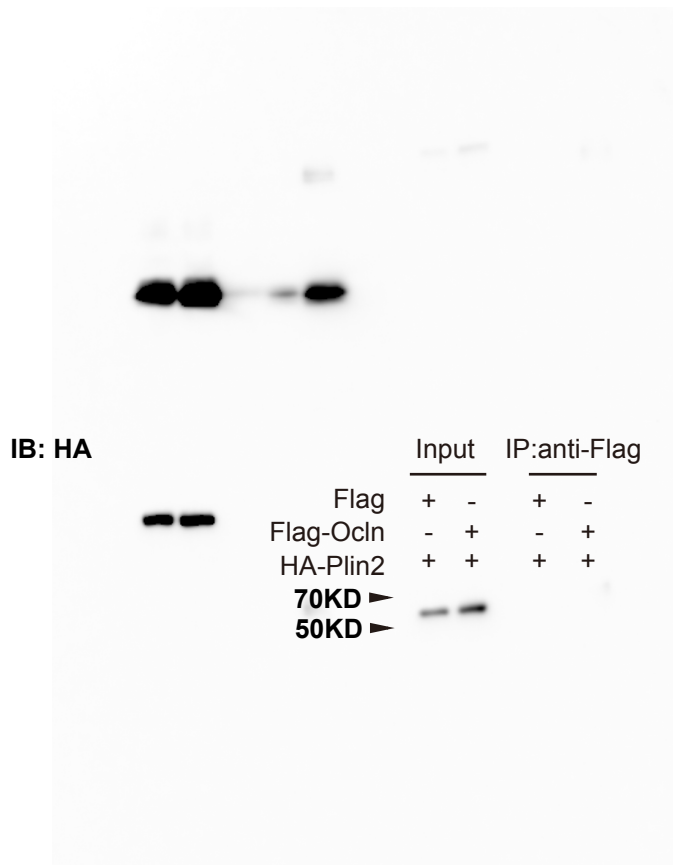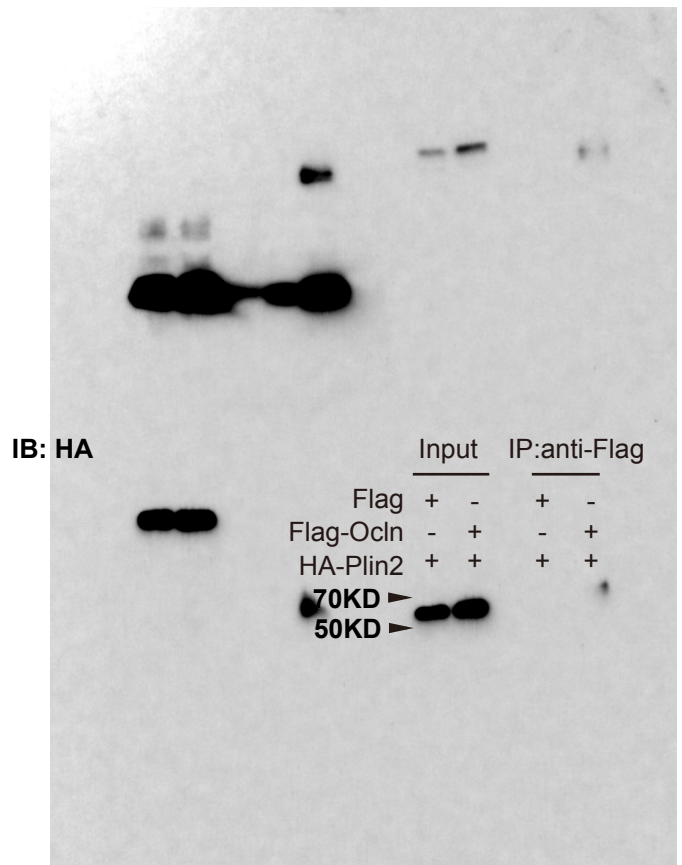

Raw images for the blots in Fig.6C

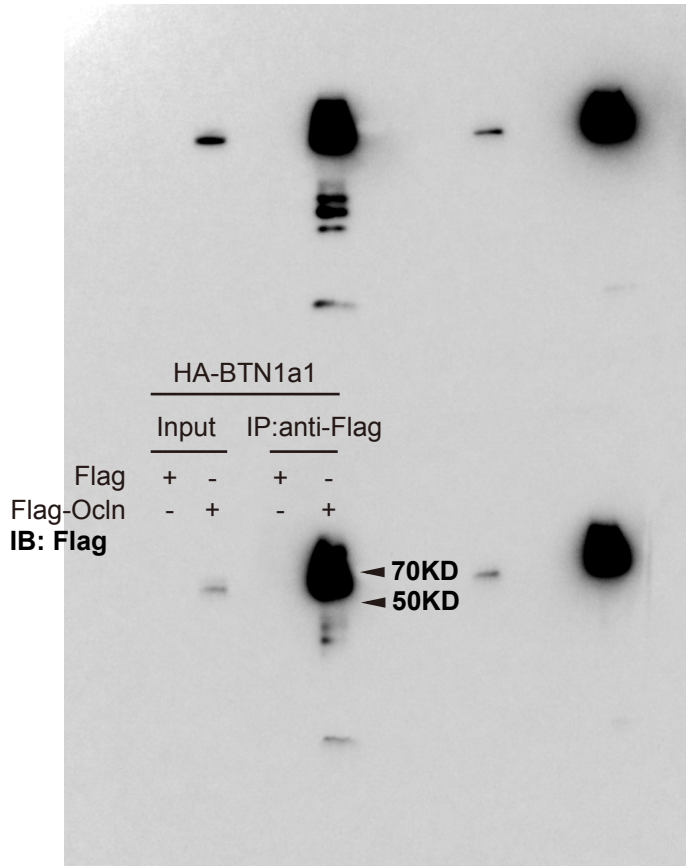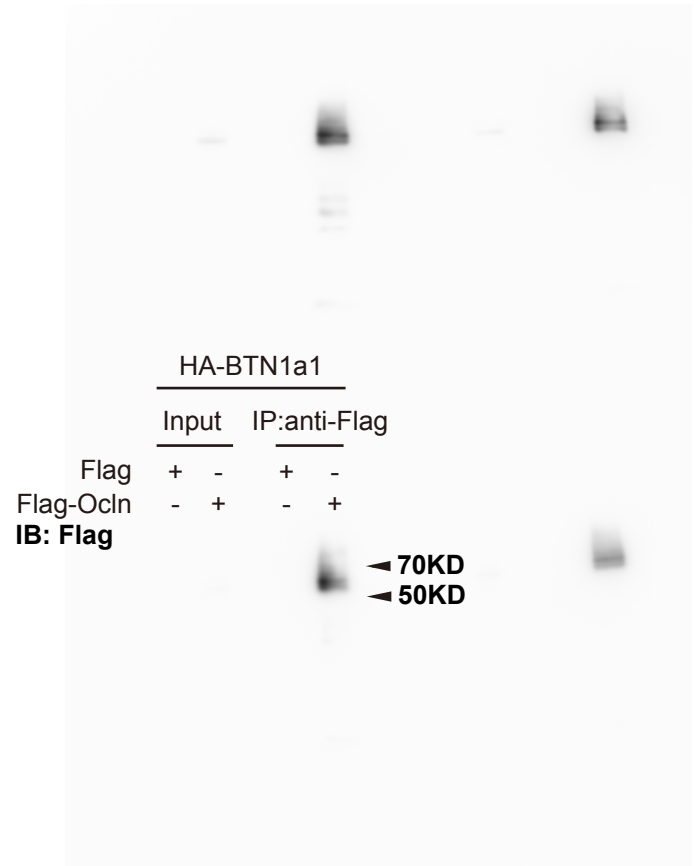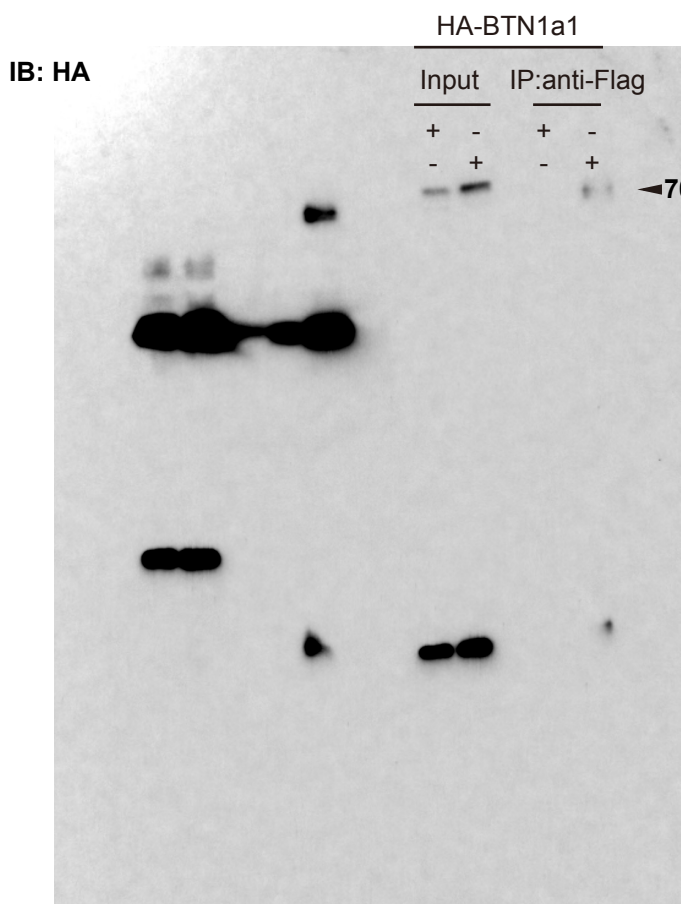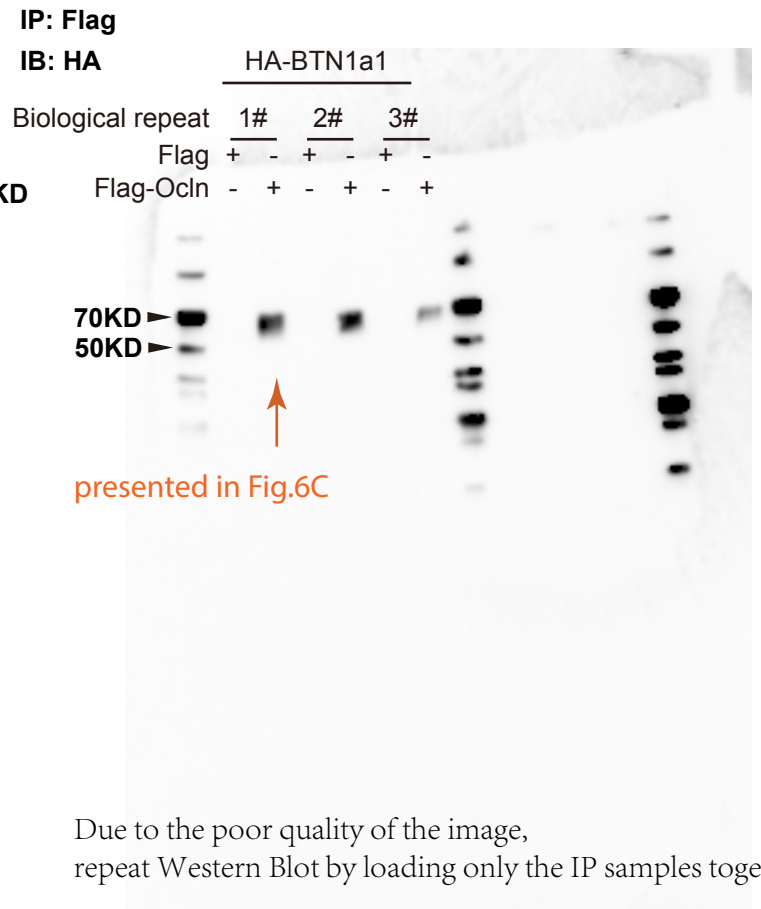

Due to the poor quality of the image, repeat Western Blot by loading only the IP samples together.

Raw images for the blots in Fig.6D

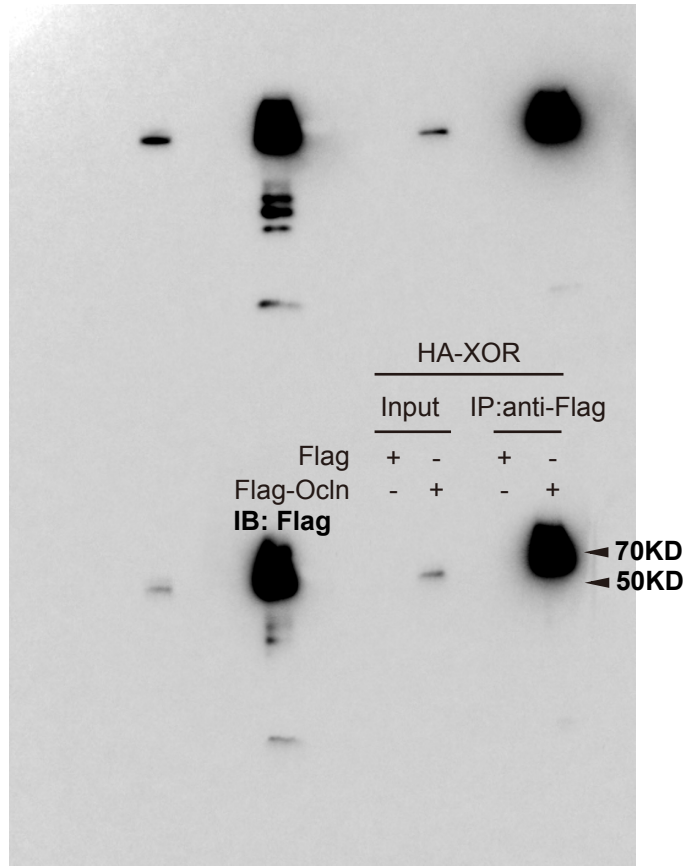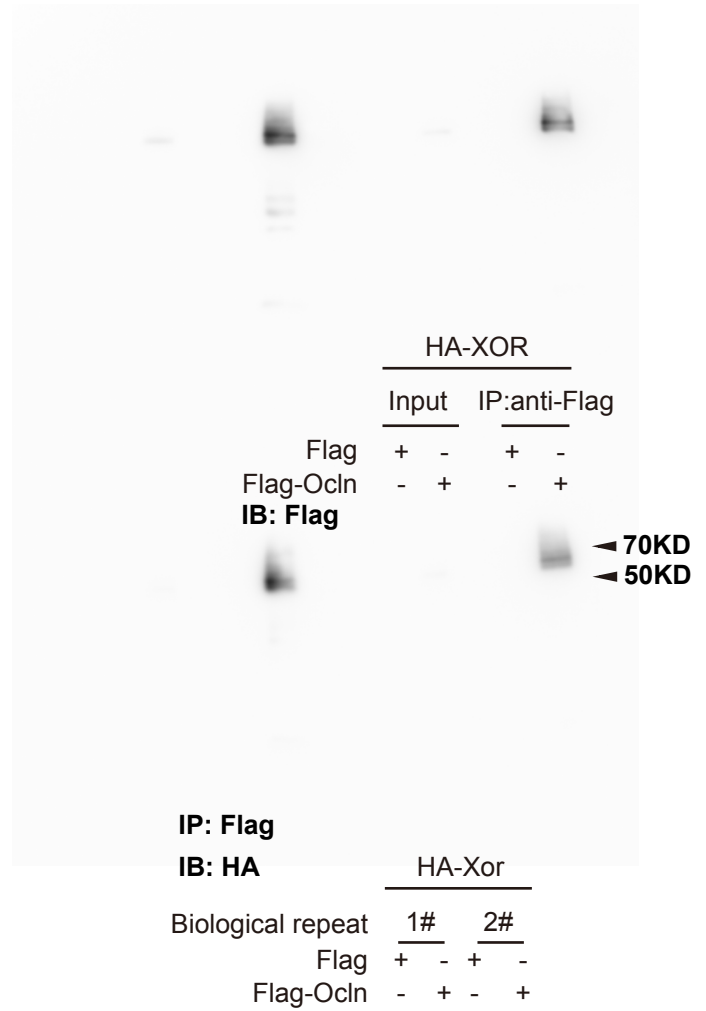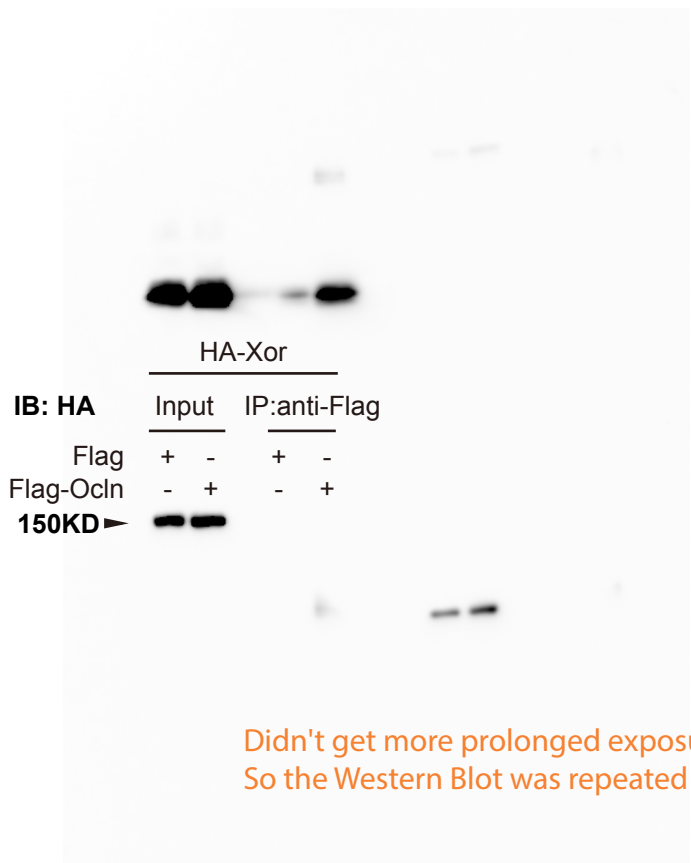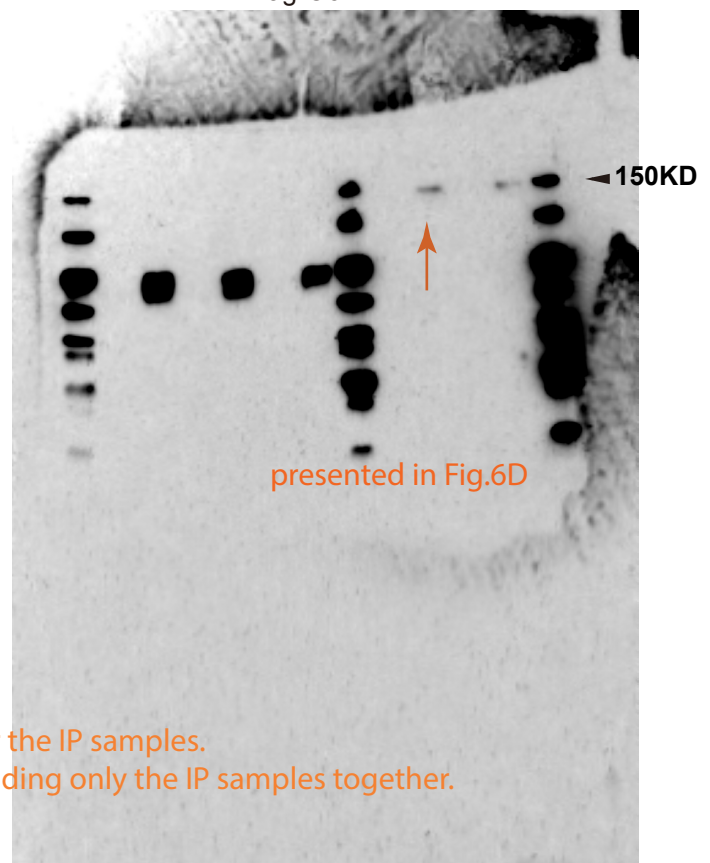

Didn't get more prolonged exposure for the IP samples.  
So the Western Blot was repeated by loading only the IP samples together.

# Raw images for the blots in Fig.6G/H

**IB: HA**

|              | Input |   |   |   | IP:Flag |   |   |   |
|--------------|-------|---|---|---|---------|---|---|---|
|              | +     | - | - | - | +       | - | - | - |
| FLAG         | +     | - | - | - | +       | - | - | - |
| FLAG-OCLN    | -     | + | - | - | -       | + | - | - |
| FLAG-OCLN-ΔN | -     | - | + | - | -       | - | + | - |
| FLAG-OCLN-ΔC | -     | - | - | + | -       | - | - | + |
| HA-BTN1A1    | +     | + | + | + | +       | + | + | + |

**70KD** ▶

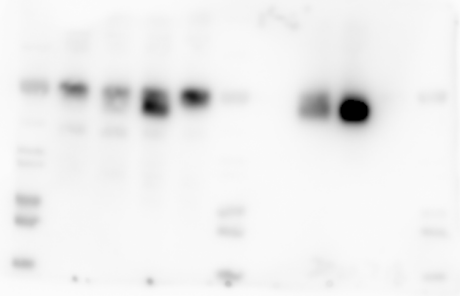

|              | Input |   |   |   | IP:Flag |   |   |   |
|--------------|-------|---|---|---|---------|---|---|---|
|              | +     | - | - | - | +       | - | - | - |
| FLAG         | +     | - | - | - | +       | - | - | - |
| FLAG-OCLN    | -     | + | - | - | -       | + | - | - |
| FLAG-OCLN-ΔN | -     | - | + | - | -       | - | + | - |
| FLAG-OCLN-ΔC | -     | - | - | + | -       | - | - | + |
| HA-XOR       | +     | + | + | + | +       | + | + | + |

**150KD** ▶

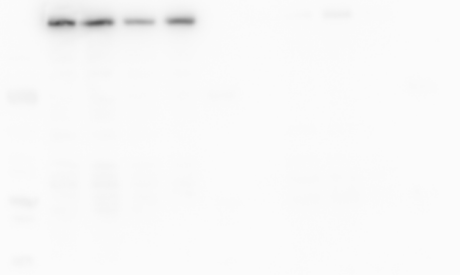

|              | Input |   |   |   | IP:Flag |   |   |   |
|--------------|-------|---|---|---|---------|---|---|---|
|              | +     | - | - | - | +       | - | - | - |
| FLAG         | +     | - | - | - | +       | - | - | - |
| FLAG-OCLN    | -     | + | - | - | -       | + | - | - |
| FLAG-OCLN-ΔN | -     | - | + | - | -       | - | + | - |
| FLAG-OCLN-ΔC | -     | - | - | + | -       | - | - | + |
| HA-XOR       | +     | + | + | + | +       | + | + | + |

◀ **150KD**

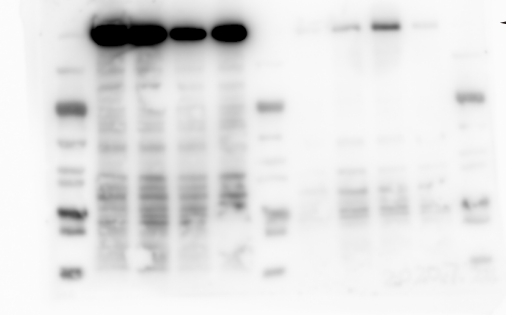

Raw images for the blots in Fig.7A

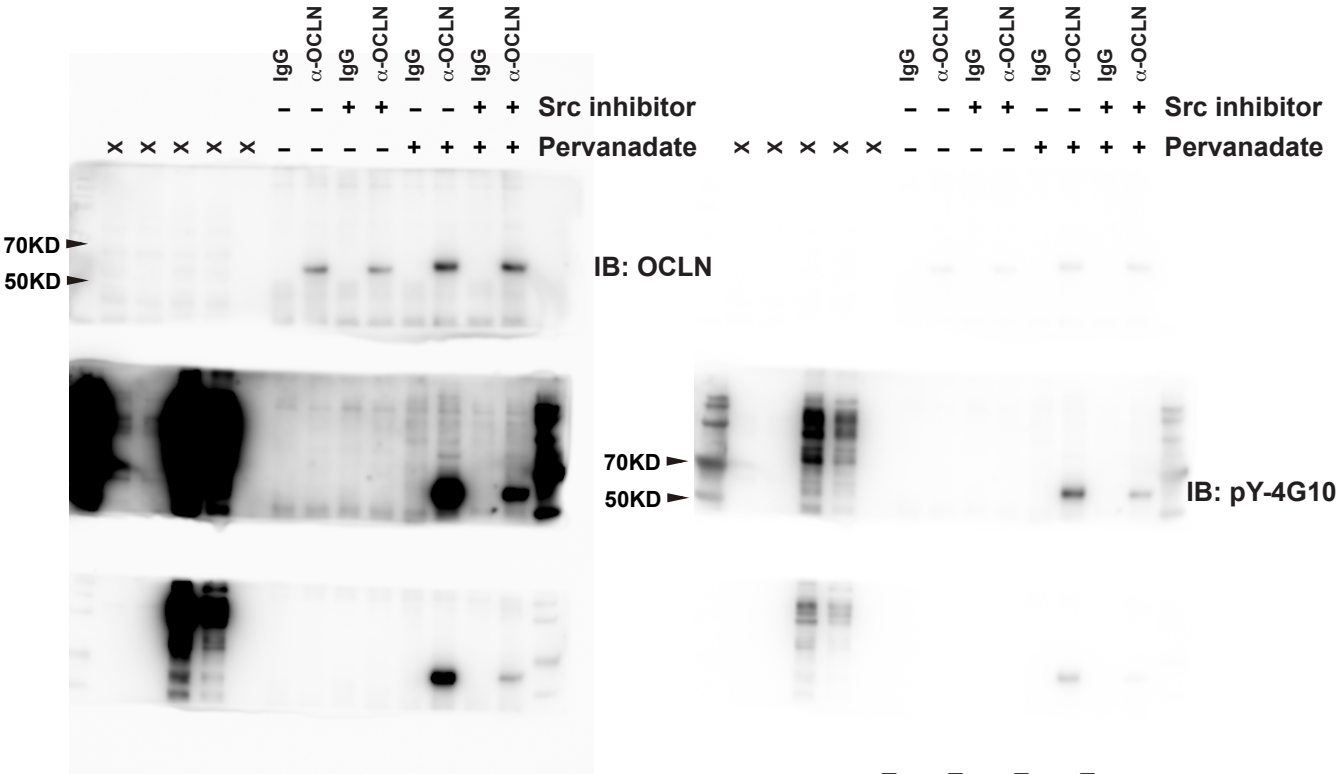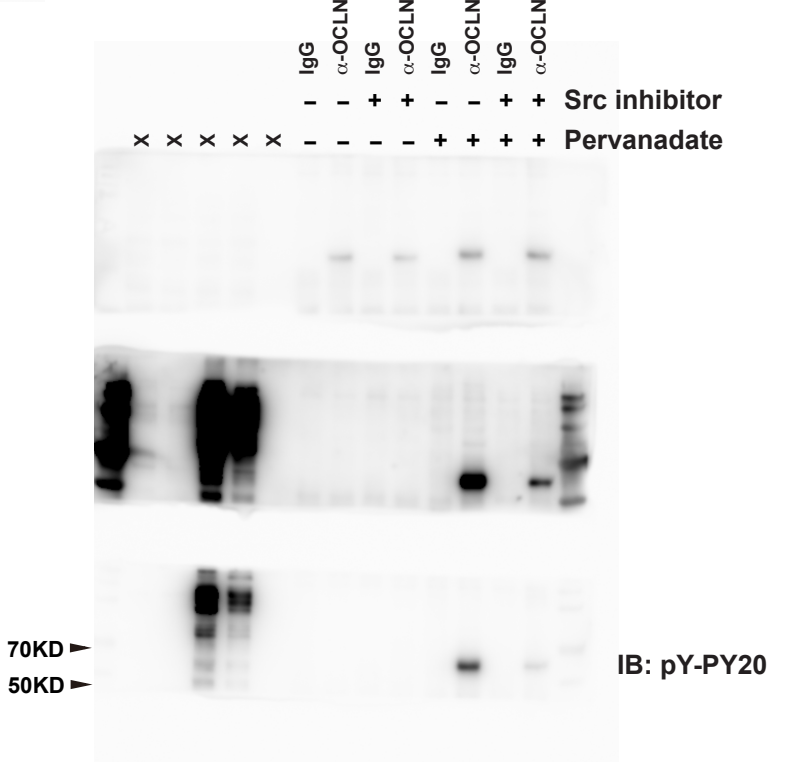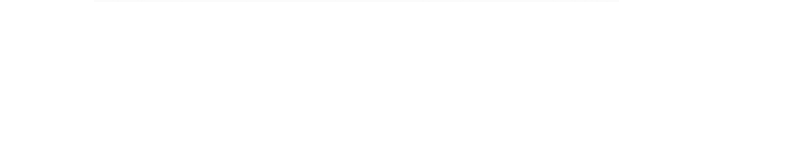

Raw images for the blots in Fig.7D

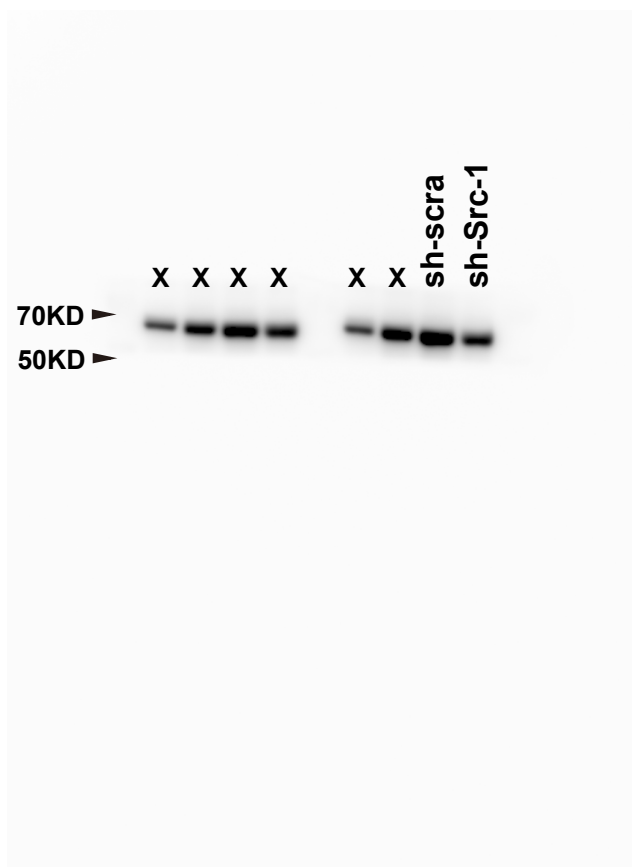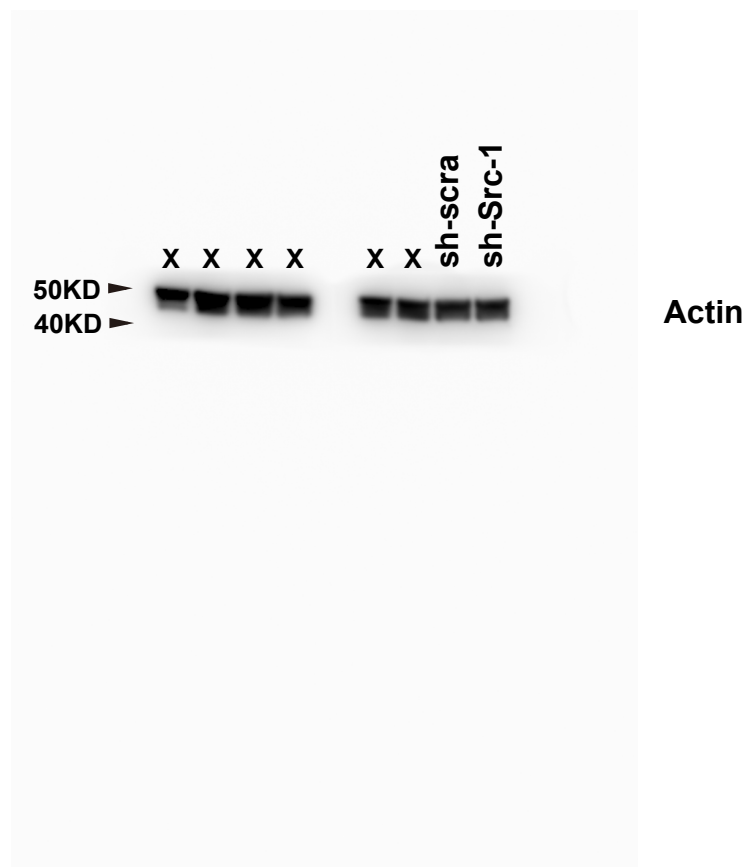

Raw images for the blots in Fig.7F

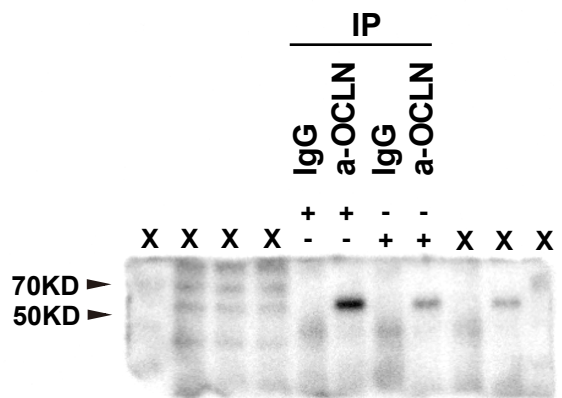

sh-scra  
sh-Src-1  
IB: OCLN

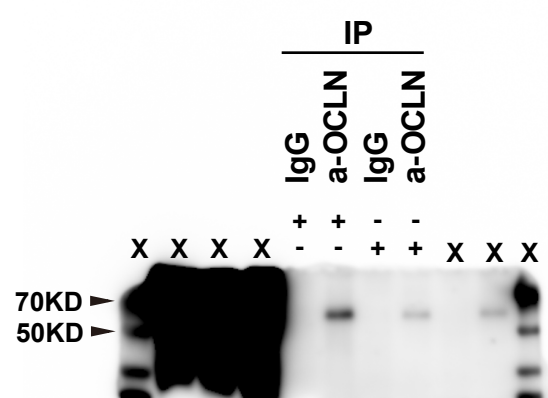

sh-scra  
sh-Src-1  
IB: pY-4G10

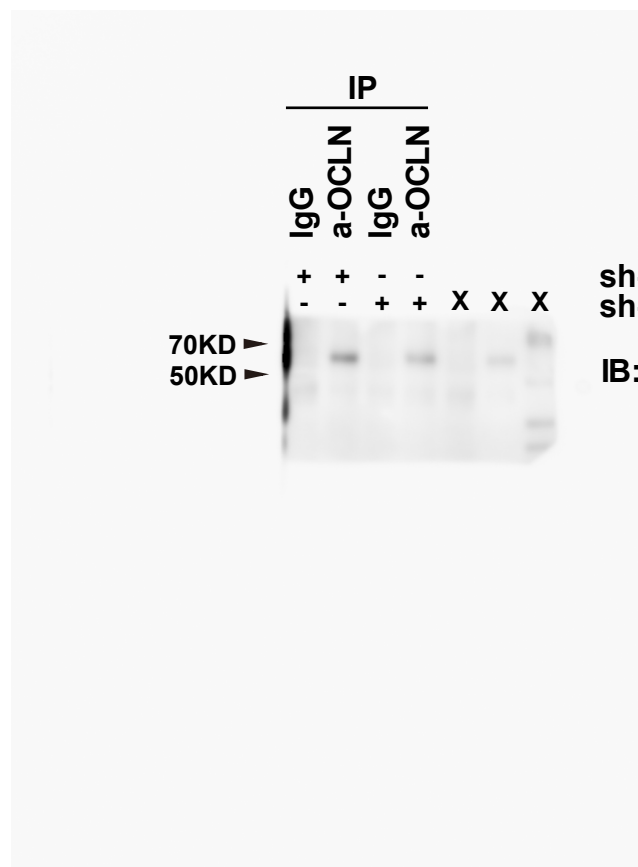

sh-scra  
sh-Src-1  
IB: pY-PY20

Raw images for the blots in Fig.7H

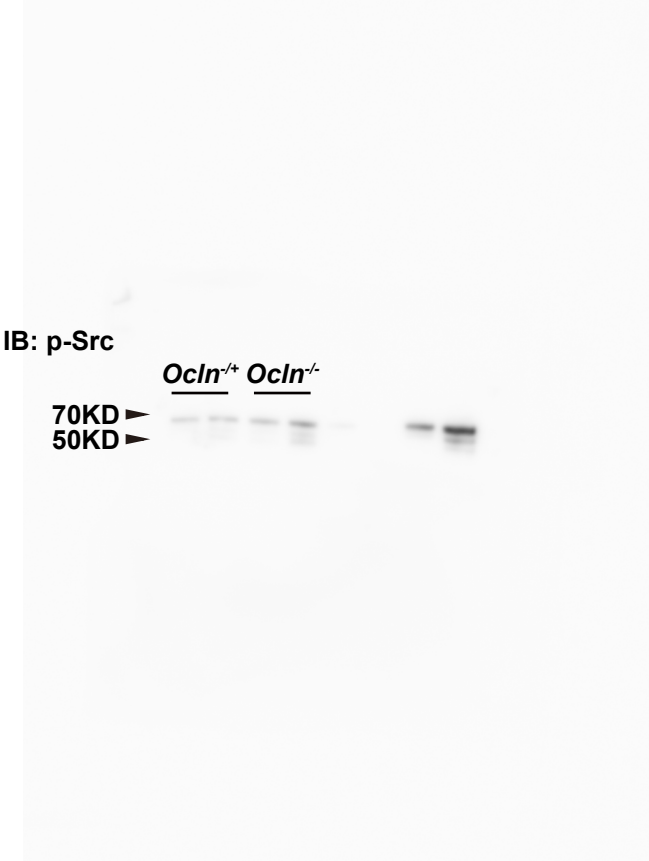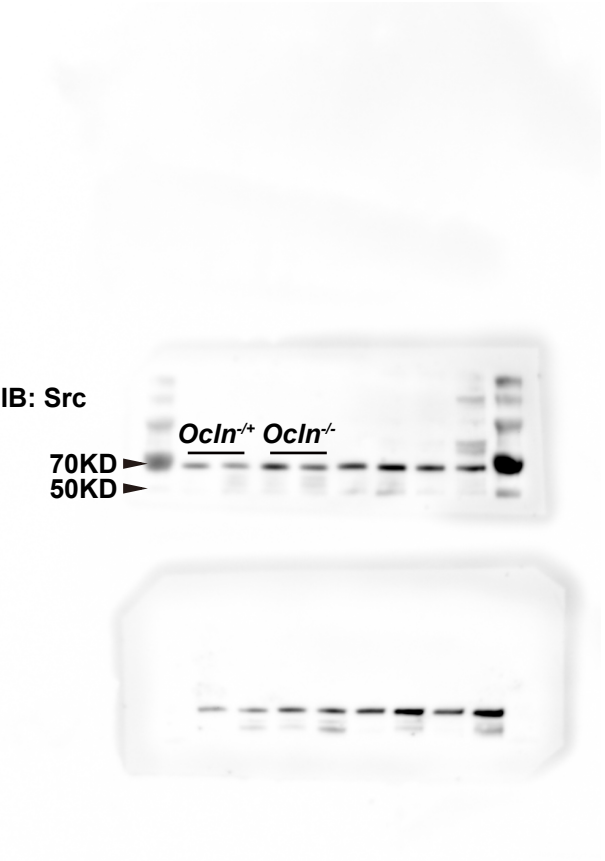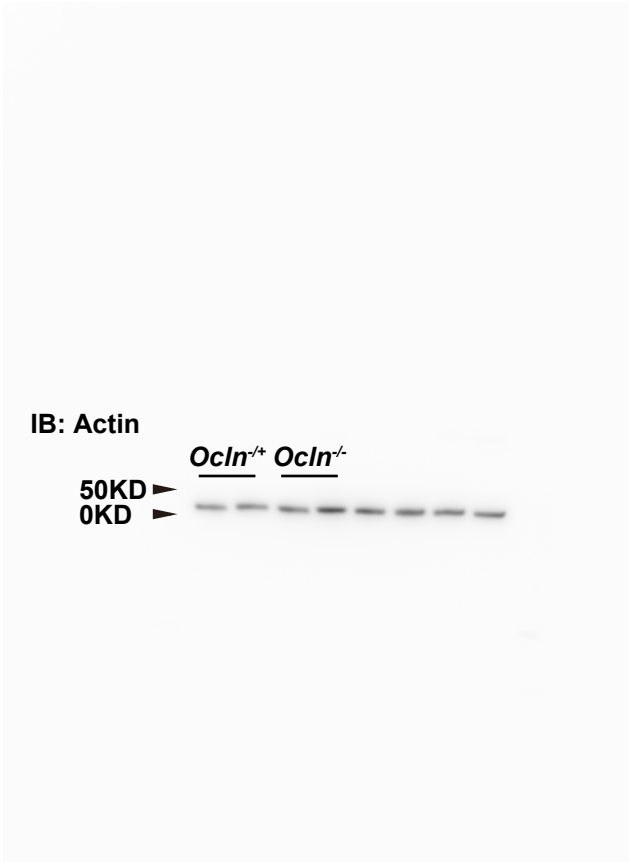



Raw images for the blots in supplementary Fig. 4A

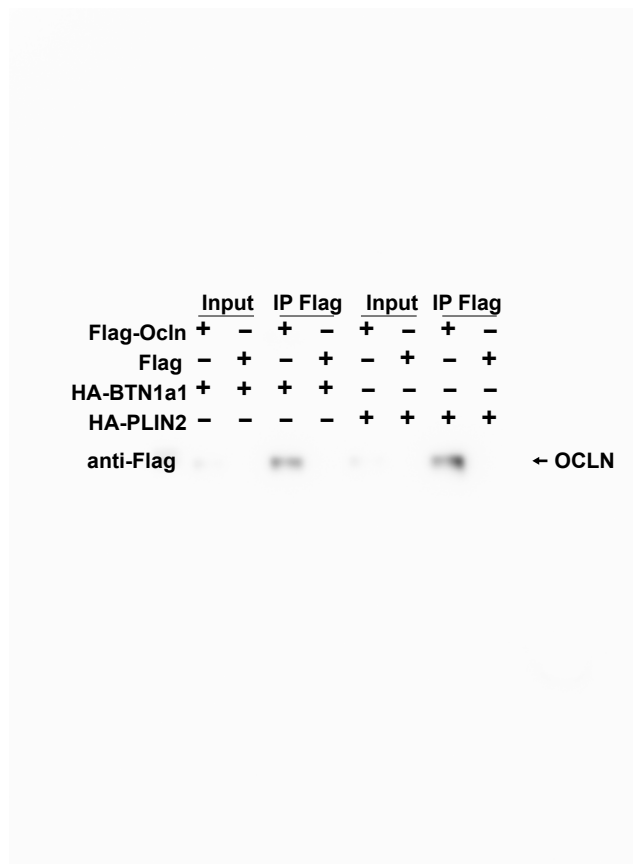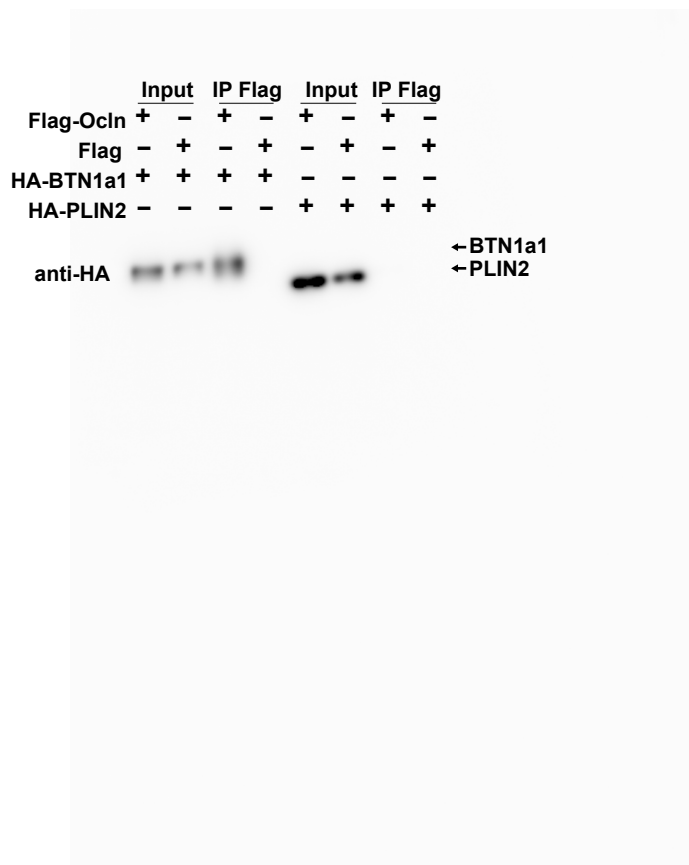

Supplement: pbio.3001518.s012.pdf [file pbio.3001518.s012.pdf]
